# Supplementary material for: Tuning the reactivity of Ru nanoparticles by defect engineering of the reduced graphene oxide support
Source: Royal Society of Chemistry journal article supplement (doi:10.1039/c4ra02900c), 2014-01-01
Supplement: c4ra02900c1.pdf [file c4ra02900c1.pdf]

## Supplementary Information

# Tuning the Reactivity of Ru Nanoparticles by Defect Engineering of the Reduced Graphene Oxide Support

Xin Liu,<sup>\*a</sup> Yanhui Sui,<sup>a</sup> Changgong Meng<sup>a</sup> and Yu Han<sup>\*b</sup>

<sup>a</sup> School of Chemistry, Dalian University of Technology, Dalian, China.

<sup>b</sup> Advanced Membranes and Porous Materials Center, Physical Sciences and Engineering Division, King Abdullah University of Science and Technology, Thuwal 23955-6900, Saudi Arabia.

---

\* Corresponding Authors:

Dr. Xin Liu and Prof. Yu Han

Tel: +86-411-84708545(XL), +966-2-8082407(YH)

Email: xliu@dlut.edu.cn(XL), yu.han@kaust.edu.sa (YH)

## Formation energy of defective graphene

The formation energy of defect is defined as the following:

$$E_{\text{formation}} = E_{\text{defect}} - \frac{m}{n} E_{\text{perfect}}$$

where  $E_{\text{defect}}$  and  $E_{\text{perfect}}$  are the total energies of defective and perfect graphene, respectively.  $n$  is the number of atoms in the perfect graphene, while  $m$  is the number of atoms in the defective graphene.

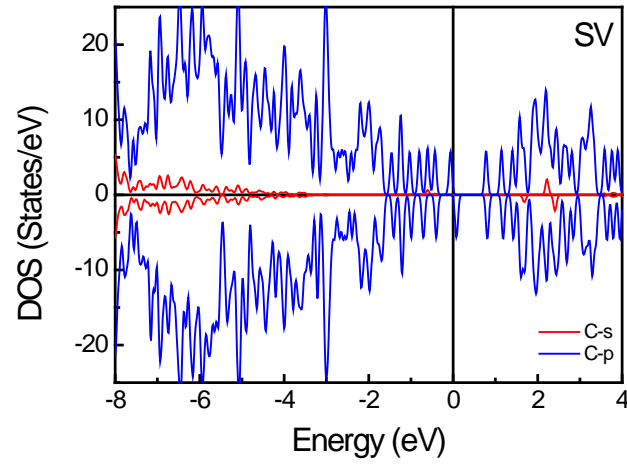

Figure S1. The DOS of SV.

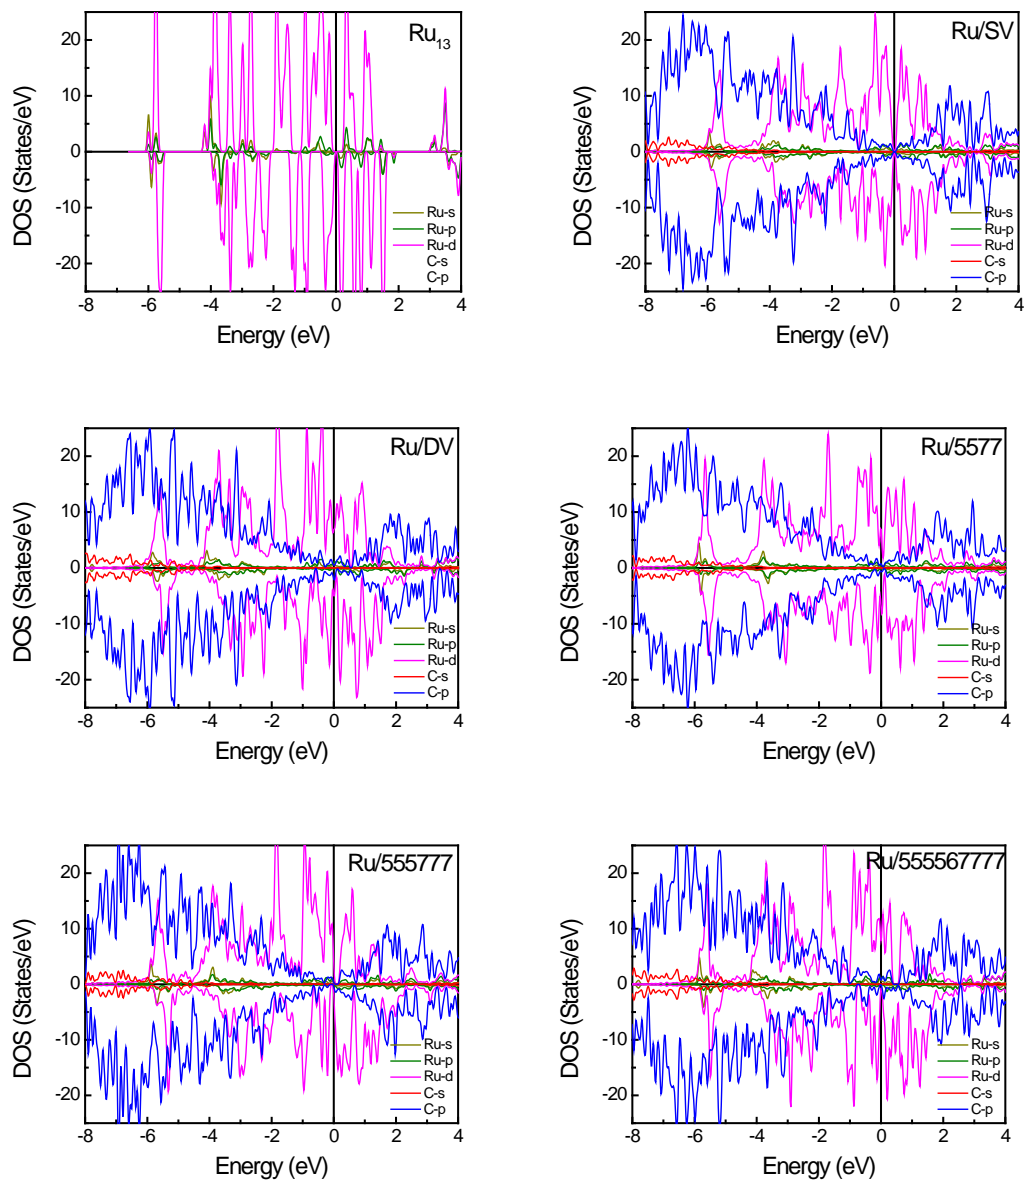

Figure S2. The DOS of Ru<sub>13</sub>, Ru/SV, Ru/DV, Ru/5577, Ru/555777 and Ru/555567777 composites.
